# Supplementary material for: FAD/NADH Dependent Oxidoreductases: From Different Amino Acid Sequences to Similar Protein Shapes for Playing an Ancient Function
Source: MDPI journal article supplement (doi:10.3390/jcm8122117), 2019-12-02
Supplement: s1 [file s1]

# Supp. Fig. 1

Tree scale: 1

## Colored ranges

- NDI.NDH2.DH
- PyridineNT.Disulfide.CoA.NADPH.DH
- AIF.Ferredoxin.Reductase
- Thioredoxin.Glutathione.Reductase
- Lipoamide.DH

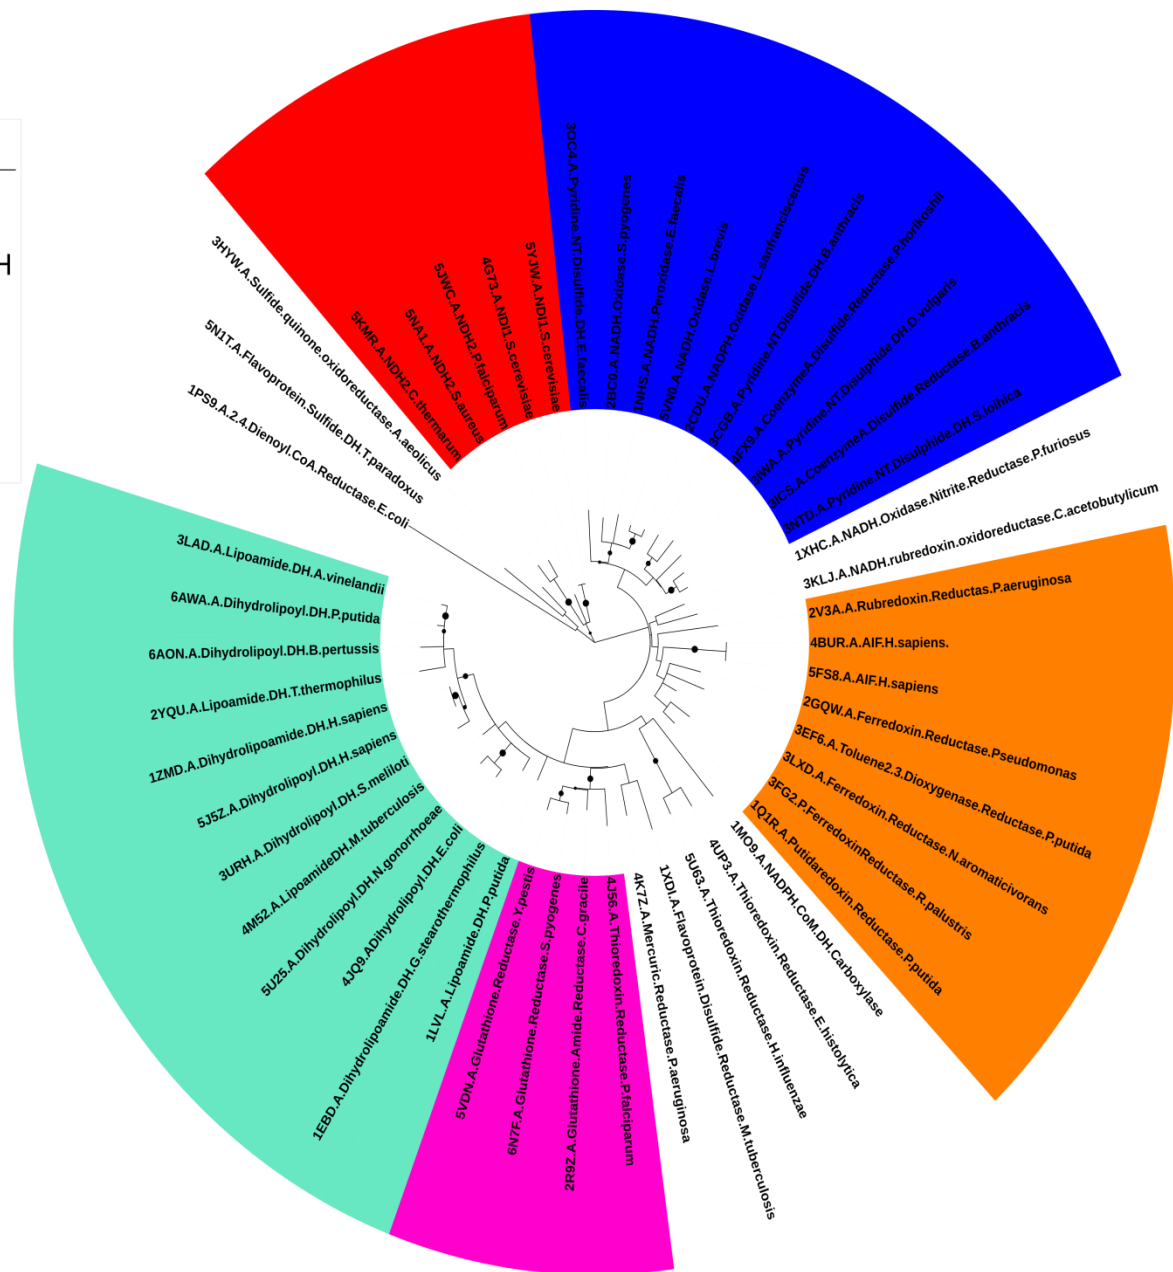

## Supp. Fig. 2

NP\_001199.1\_homo\_sapiens\_AF

4BURA.AF.Hazpiens

5F58A.AF.Hazpiens

5V10A.A.NADH.Oxidase.Lbrevis

1Y9C.A.A.NADH.Oxidase.P.furiosus

2B0A.A.NADH.Oxidase.S.pyogenes

2G0A.A.NADH.Oxidase.Lznanfrancensis

1NHS.A.NADH.Peroxidase.E.fecalis

3X1D.A.Ferredoxin.Reductase.N.aerovariorans

3F2A.A.Ferredoxin.Reductase.P.putida

2G0W.A.Ferredoxin.Reductase.Pseudomonas

2V3A.A.Rubredoxin.Reductase.P.aeruginosa

3KLJ.A.NADH.rubredoxin.oxygenoreductase.C.acetobutylicus

3E6F.A.Toluene.2.3.Oxygenase.Reductase.P.putida

1Q1R.A.Pyridine.NT.Dsulfide.D.H.eucalis

30C4.A.Pyridine.NT.Dsulfide.D.H.eucalis

3WA.A.Pyridine.NT.Dsulfide.D.H.vulgaris

30GB.A.Pyridine.NT.Dsulfide.D.H.anthraxis

4P3A.A.Genzoye.A.Dsulfide.Reductase.P.horikoshii

3C5A.A.Genzoye.A.Dsulfide.Reductase.B.anthraxis

3WTD.A.Pyridine.NT.Dsulfide.D.H.silicicola

5M9R.A.NDH2.C.thermaurum

5N1T.A.Flavoprotein.Sulfide.DH.T.paradoxus

5N41.A.NDH2.S.aureus

5N4C.A.NDH2.P.felipensis

3HW.A.Sulfide quinone oxidoreductase.A.aerolicus

4G73.A.NDH1.S.cerevisiae

5Y1W.A.NDH1.S.cerevisiae

4M52.A.Lipoamide.DH.muticulus

4J09.A.Dihydrolipo.DH.B.putida

4J09.A.Dihydrolipo.DH.E.coli

6A1W.A.Dihydrolipo.DH.P.putida

5U25.A.Dihydrolipo.DH.N.gonothoeae

5A25.A.Dihydrolipo.DH.Hazpiens

12MD.A.Dihydrolipo.DH.Hazpiens

3URH.A.Dihydrolipo.DH.S.mellitii

1LVL.A.Lipoamide.DH.P.putida

1EBD.A.Dihydrolipoamide.DH.G.ateothemophilus

2Y0U.A.Lipoamide.DH.T.thermophilus

3LAD.A.Lipoamide.DH.A.vinelandii

2R9Z.A.Glutathione.Amide.Reductase.G.craigei

6N7F.A.Glutathione.Reductase.S.pyogenes

5V0N.A.Glutathione.Reductase.Y.peseti

4J5A.A.Thioiodine.Reductase.P.falcapsum

1X0A.A.Thioiodine.Reductase.P.tuberculosis

1M09.A.NADPH.CoM.DH.Carboxylase

4K72.A.Mercuric.Reductase.P.aeruginosa

4UP3.A.Thioiodine.Reductase.E.histolytica

8U3A.A.Thioiodine.Reductase.Hinfuenzae

1P59.A.2.4.Dienoyl.CoA.Reductase.E.coli

NP\_001199.1\_homo\_sapiens\_AF

4BURA.AF.Hazpiens

5F58A.AF.Hazpiens

5V10A.A.NADH.Oxidase.Lbrevis

1Y9C.A.A.NADH.Oxidase.Nitrite.Reductase.P.furiosus

2B0A.A.NADH.Oxidase.S.pyogenes

2G0A.A.NADH.Oxidase.Lznanfrancensis

1NHS.A.NADH.Peroxidase.E.fecalis

3X1D.A.Ferredoxin.Reductase.N.aerovariorans

3F2A.A.Ferredoxin.Reductase.P.putida

2G0W.A.Ferredoxin.Reductase.Pseudomonas

2V3A.A.Rubredoxin.Reductase.P.aeruginosa

3KLJ.A.NADH.rubredoxin.oxygenoreductase.C.acetobutylicus

3E6F.A.Toluene.2.3.Oxygenase.Reductase.P.putida

1Q1R.A.Pyridine.NT.Dsulfide.D.H.eucalis

30C4.A.Pyridine.NT.Dsulfide.D.H.eucalis

3WA.A.Pyridine.NT.Dsulfide.D.H.vulgaris

30GB.A.Pyridine.NT.Dsulfide.D.H.anthraxis

4P3A.A.Genzoye.A.Dsulfide.Reductase.P.horikoshii

3C5A.A.Genzoye.A.Dsulfide.Reductase.B.anthraxis

3WTD.A.Pyridine.NT.Dsulfide.D.H.silicicola

5M9R.A.NDH2.C.thermaurum

5N1T.A.Flavoprotein.Sulfide.DH.T.paradoxus

5N41.A.NDH2.S.aureus

5N4C.A.NDH2.P.felipensis

3HW.A.Sulfide quinone oxidoreductase.A.aerolicus

4G73.A.NDH1.S.cerevisiae

5Y1W.A.NDH1.S.cerevisiae

4M52.A.Lipoamide.DH.muticulus

4J09.A.Dihydrolipo.DH.B.putida

4J09.A.Dihydrolipo.DH.E.coli

6A1W.A.Dihydrolipo.DH.P.putida

5U25.A.Dihydrolipo.DH.N.gonothoeae

5A25.A.Dihydrolipo.DH.Hazpiens

12MD.A.Dihydrolipo.DH.Hazpiens

3URH.A.Dihydrolipo.DH.S.mellitii

1LVL.A.Lipoamide.DH.P.putida

1EBD.A.Dihydrolipoamide.DH.G.ateothemophilus

2Y0U.A.Lipoamide.DH.T.thermophilus

3LAD.A.Lipoamide.DH.A.vinelandii

2R9Z.A.Glutathione.Amide.Reductase.G.craigei

6N7F.A.Glutathione.Reductase.S.pyogenes

5V0N.A.Glutathione.Reductase.Y.peseti

4J5A.A.Thioiodine.Reductase.P.falcapsum

1X0A.A.Thioiodine.Reductase.P.tuberculosis

1M09.A.NADPH.CoM.DH.Carboxylase

4K72.A.Mercuric.Reductase.P.aeruginosa

4UP3.A.Thioiodine.Reductase.E.histolytica

8U3A.A.Thioiodine.Reductase.Hinfuenzae

1P59.A.2.4.Dienoyl.CoA.Reductase.E.coli

334.F.F.K.N.M.M.I.R

241.293.VA.V.

399.431.I.W.V.A.

438.440.R.R.R.V.H.H.V.A.V.V

462.482.F.W.S.L.P.V.V.V.V.A

404.380.F.W.S.L.P.V.V.V.V.A

332.F.F.K.N.M.M.I.R

241.293.VA.V.

399.431.I.W.V.A.

438.440.R.R.R.V.H.H.V.A.V.V

462.482.F.W.S.L.P.V.V.V.V.A

404.380.F.W.S.L.P.V.V.V.V.A

227.F.F.K.N.M.M.I.R

236.287.I.C.A.I.

231.263.VA.V.

208.274.I.A.L.A.S.A.A.M.A.S.A

302.374.V.V.F.F.E.N.C.I.A.I

392.302.374.V.V.F.F.E.N.C.I.A.I

224.V.V.V.L.C.L.A.V.

233.284.I.L.A.V.

288.321.VF.A.A.

326.338.V.V.V.A.L.A.V.V.V.V

351.371.V.V.V.V.V.V.V.V.V.V

393.327.302.374.V.V.F.F.E.N.C.I.A.I

224.V.V.V.L.C.L.A.V.

233.284.I.L.A.V.

288.321.VF.A.A.

326.338.V.V.V.A.L.A.V.V.V.V

351.371.V.V.V.V.V.V.V.V.V.V

393.327.302.374.V.V.F.F.E.N.C.I.A.I

176.I.L.L.R.L.V.L.V.

188.230.VA.V.A.

243.276.VF.A.A.

291.263.VV.V.A.L.A.V.V.V.V

300.320.S.L.A.V.V.V.V.V.V.V.V

316.311.320.S.L.A.V.V.V.V.V.V.V.V

331.320.F.W.S.L.P.V.V.V.V.V

172.F.F.K.N.M.M.I.R

236.287.I.C.A.I.

231.263.VA.V.

208.274.I.A.L.A.S.A.A.M.A.S.A

302.374.V.V.F.F.E.N.C.I.A.I

392.302.374.V.V.F.F.E.N.C.I.A.I

175.202.F.R.L.M.R.A.

234.232.VV.V.I.

236.268.VV.A.V.

273.285.F.R.V.V.V.V.V.V.V.V

298.310.V.V.V.V.V.V.V.V.V.V

330.320.F.W.S.L.P.V.V.V.V.V

175.A.R.C.V.V.V.V.V.V

184.236.VV.V.I.

236.268.VV.A.V.

273.285.F.R.V.V.V.V.V.V.V.V

298.310.V.V.V.V.V.V.V.V.V.V

330.320.F.W.S.L.P.V.V.V.V.V

176.I.L.L.R.L.V.L.V.

188.230.VA.V.A.

243.276.VF.A.A.

291.263.VV.V.A.L.A.V.V.V.V

300.320.S.L.A.V.V.V.V.V.V.V.V

316.311.320.S.L.A.V.V.V.V.V.V.V.V

331.320.F.W.S.L.P.V.V.V.V.V

172.F.F.K.N.M.M.I.R

236.287.I.C.A.I.

231.263.VA.V.

208.274.I.A.L.A.S.A.A.M.A.S.A

302.374.V.V.F.F.E.N.C.I.A.I

392.302.374.V.V.F.F.E.N.C.I.A.I

175.202.F.R.L.M.R.A.

234.232.VV.V.I.

236.268.VV.A.V.

273.285.F.R.V.V.V.V.V.V.V.V

298.310.V.V.V.V.V.V.V.V.V.V

330.320.F.W.S.L.P.V.V.V.V.V

175.A.R.C.V.V.V.V.V.V

184.236.VV.V.I.

236.268.VV.A.V.

273.285.F.R.V.V.V.V.V.V.V.V

298.310.V.V.V.V.V.V.V.V.V.V

330.320.F.W.S.L.P.V.V.V.V.V

176.I.L.L.R.L.V.L.V.

188.230.VA.V.A.

243.276.VF.A.A.

291.263.VV.V.A.L.A.V.V.V.V

300.320.S.L.A.V.V.V.V.V.V.V.V

316.311.320.S.L.A.V.V.V.V.V.V.V.V

331.320.F.W.S.L.P.V.V.V.V.V

172.F.F.K.N.M.M.I.R

236.287.I.C.A.I.

231.263.VA.V.

208.274.I.A.L.A.S.A.A.M.A.S.A

302.374.V.V.F.F.E.N.C.I.A.I

392.302.374.V.V.F.F.E.N.C.I.A.I

175.202.F.R.L.M.R.A.

234.232.VV.V.I.

236.268.VV.A.V.

273.285.F.R.V.V.V.V.V.V.V.V

298.310.V.V.V.V.V.V.V.V.V.V

330.320.F.W.S.L.P.V.V.V.V.V

175.A.R.C.V.V.V.V.V.V

184.236.VV.V.I.

236.268.VV.A.V.

273.285.F.R.V.V.V.V.V.V.V.V

298.310.V.V.V.V.V.V.V.V.V.V

330.320.F.W.S.L.P.V.V.V.V.V

176.I.L.L.R.L.V.L.V.

188.230.VA.V.A.

243.276.VF.A.A.

291.263.VV.V.A.L.A.V.V.V.V

300.320.S.L.A.V.V.V.V.V.V.V.V

316.311.320.S.L.A.V.V.V.V.V.V.V.V

331.320.F.W.S.L.P.V.V.V.V.V

172.F.F.K.N.M.M.I.R

236.287.I.C.A.I.

231.263.VA.V.

208.274.I.A.L.A.S.A.A.M.A.S.A

302.374.V.V.F.F.E.N.C.I.A.I

392.302.374.V.V.F.F.E.N.C.I.A.I

175.202.F.R.L.M.R.A.

234.232.VV.V.I.

236.268.VV.A.V.

273.285.F.R.V.V.V.V.V.V.V.V

298.310.V.V.V.V.V.V.V.V.V.V

330.320.F.W.S.L.P.V.V.V.V.V

175.A.R.C.V.V.V.V.V.V

184.236.VV.V.I.

236.268.VV.A.V.

273.285.F.R.V.V.V.V.V.V.V.V

298.310.V.V.V.V.V.V.V.V.V.V

330.320.F.W.S.L.P.V.V.V.V.V

176.I.L.L.R.L.V.L.V.

188.230.VA.V.A.

243.276.VF.A.A.

291.263.VV.V.A.L.A.V.V.V.V

300.320.S.L.A.V.V.V.V.V.V.V.V

316.311.320.S.L.A.V.V.V.V.V.V.V.V

331.320.F.W.S.L.P.V.V.V.V.V

172.F.F.K.N.M.M.I.R

236.287.I.C.A.I.

231.263.VA.V.

208.274.I.A.L.A.S.A.A.M.A.S.A

302.374.V.V.F.F.E.N.C.I.A.I

392.302.374.V.V.F.F.E.N.C.I.A.I

175.202.F.R.L.M.R.A.

234.232.VV.V.I.

236.268.VV.A.V.

273.285.F.R.V.V.V.V.V.V.V.V

298.310.V.V.V.V.V.V.V.V.V.V

330.320.F.W.S.L.P.V.V.V.V.V

175.A.R.C.V.V.V.V.V.V

184.236.VV.V.I.

236.268.VV.A.V.

273.285.F.R.V.V.V.V.V.V.V.V

298.310.V.V.V.V.V.V.V.V.V.V

330.320.F.W.S.L.P.V.V.V.V.V

176.I.L.L.R.L.V.L.V.

188.230.VA.V.A.

243.276.VF.A.A.

291.263.VV.V.A.L.A.V.V.V.V

300.320.S.L.A.V.V.V.V.V.V.V.V

316.311.320.S.L.A.V.V.V.V.V.V.V.V

331.320.F.W.S.L.P.V.V.V.V.V

172.F.F.K.N.M.M.I.R

236.287.I.C.A.I.

231.263.VA.V.

208.274.I.A.L.A.S.A.A.M.A.S.A

302.374.V.V.F.F.E.N.C.I.A.I

392.302.374.V.V.F.F.E.N.C.I.A.I

175.202.F.R.L.M.R.A.

234.232.VV.V.I.

236.268.VV.A.V.

273.285.F.R.V.V.V.V.V.V.V.V

298.310.V.V.V.V.V.V.V.V.V.V

330.320.F.W.S.L.P.V.V.V.V.V

175.A.R.C.V.V.V.V.V.V

184.236.VV.V.I.

236.268.VV.A.V.

273.285.F.R.V.V.V.V.V.V.V.V

298.310.V.V.V.V.V.V.V.V.V.V

330.320.F.W.S.L.P.V.V.V.V.V

176.I.L.L.R.L.V.L.V.

188.230.VA.V.A.

243.276.VF.A.A.

291.263.VV.V.A.L.A.V.V.V.V

300.320.S.L.A.V.V.V.V.V.V.V.V

316.311.320.S.L.A.V.V.V.V.V.V.V.V

331.320.F.W.S.L.P.V.V.V.V.V

172.F.F.K.N.M.M.I.R

236.287.I.C.A.I.

231.263.VA.V.

208.274.I.A.L.A.S.A.A.M.A.S.A

302.374.V.V.F.F.E.N.C.I.A.I

392.302.374.V.V.F.F.E.N.C.I.A.I

175.202.F.R.L.M.R.A.

234.232.VV.V.I.

236.268.VV.A.V.

273.285.F.R.V.V.V.V.V.V.V.V

298.310.V.V.V.V.V.V.V.V.V.V

330.320.F.W.S.L.P.V.V.V.V.V

175.A.R.C.V.V.V.V.V.V

184.236.VV.V.I.

236.268.VV.A.V.

273.285.F.R.V.V.V.V.V.V.V.V

298.310.V.V.V.V.V.V.V.V.V.V

330.320.F.W.S.L.P.V.V.V.V.V

176.I.L.L.R.L.V.L.V.

188.230.VA.V.A.

243.276.VF.A.A.

291.263.VV.V.A.L.A.V.V.V.V

300.320.S.L.A.V.V.V.V.V.V.V.V

316.311.320.S.L.A.V.V.V.V.V.V.V.V

331.320.F.W.S.L.P.V.V.V.V.V

172.F.F.K.N.M.M.I.R

236.287.I.C.A.I.

231.263.VA.V.

208.274.I.A.L.A.S.A.A.M.A.S.A

302.374.V.V.F.F.E.N.C.I.A.I

392.302.374.V.V.F.F.E.N.C.I.A.I

175.202.F.R.L.M.R.A.

234.232.VV.V.I.

236.268.VV.A.V.

273.285.F.R.V.V.V.V.V.V.V.V

298.310.V.V.V.V.V.V.V.V.V.V

330.320.F.W.S.L.P.V.V.V.V.V

175.A.R.C.V.V.V.V.V.V

184.236.VV.V.I.

236.268.VV.A.V.

273.285.F.R.V.V.V.V.V.V.V.V

298.310.V.V.V.V.V.V.V.V.V.V

330.320.F.W.S.L.P.V.V.V.V.V

176.I.L.L.R.L.V.L.V.

188.230.VA.V.A.

243.276.VF.A.A.

291.263.VV.V.A.L.A.V.V.V.V

300.320.S.L.A.V.V.V.V.V.V.V.V

316.311.320.S.L.A.V.V.V.V.V.V.V.V

331.320.F.W.S.L.P.V.V.V.V.V

172.F.F.K.N.M.M.I.R

236.287.I.C.A.I.

231.263.VA.V.

208.274.I.A.L.A.S.A.A.M.A.S.A

302.374.V.V.F.F.E.N.C.I.A.I

392.302.374.V.V.F.F.E.N.C.I.A.I

175.202.F.R.L.M.R.A.

234.232.VV.V.I.

236.268.VV.A.V.

273.285.F.R.V.V.V.V.V.V.V.V

298.310.V.V.V.V.V.V.V.V.V.V

330.320.F.W.S.L.P.V.V.V.V.V

175.A.R.C.V.V.V.V.V.V

184.236.VV.V.I.

236.268.VV.A.V.

273.285.F.R.V.V.V.V.V.V.V.V

298.310.V.V.V.V.V.V.V.V.V.V

330.320.F.W.S.L.P.V.V.V.V.V

176.I.L.L.R.L.V.L.V.

188.230.VA.V.A.

243.276.VF.A.A.

291.263.VV.V.A.L.A.V.V.V.V

300.320.S.L.A.V.V.V.V.V.V.V.V

316.311.320.S.L.A.V.V.V.V.V.V.V.V

331.320.F.W.S.L.P.V.V.V.V.V

172.F.F.K.N.M.M.I.R

236.287.I.C.A.I.

231.263.VA.V.

208.274.I.A.L.A.S.A.A.M.A.S.A

302.374.V.V.F.F.E.N.C.I.A.I

392.302.374.V.V.F.F.E.N.C.I.A.I

175.202.F.R.L.M.R.A.

234.232.VV.V.I.

236.268.VV.A.V.

273.285.F.R.V.V.V.V.V.V.V.V

298.310.V.V.V.V.V.V.V.V.V.V

330.320.F.W.S.L.P.V.V.V.V.V

175.A.R.C.V.V.V.V.V.V

184.236.VV.V.I.

236.268.VV.A.V.

273.285.F.R.V.V.V.V.V.V.V.V

298.310.V.V.V.V.V.V.V.V.V.V

330.320.F.W.S.L.P.V.V.V.V.V

176.I.L.L.R.L.V.L.V.

188.230.VA.V.A.

243.276.VF.A.A.

291.263.VV.V.A.L.A.V.V.V.V

300.320.S.L.A.V.V.V.V.V.V.V.V

316.311.320.S.L.A.V.V.V.V.V.V.V.V

331.320.F.W.S.L.P.V.V.V.V.V

172.F.F.K.N.M.M.I.R

236.287.I.C.A.I.

231.263.VA.V.

208.274.I.A.L.A.S.A.A.M.A.S.A

302.374.V.V.F.F.E.N.C.I.A.I

392.302.374.V.V.F.F.E.N.C.I.A.I

175.202.F.R.L.M.R.A.

234.232.VV.V.I.

236.268.VV.A.V.

273.285.F.R.V.V.V.V.V.V.V.V

298.310.V.V.V.V.V.V.V.V.V.V

330.320.F.W.S.L.P.V.V.V.V.V

175.A.R.C.V.V.V.V.V.V

184.236.VV.V.I.

236.268.VV.A.V.

273.285.F.R.V.V.V.V.V.V.V.V

298.310.V.V.V.V.V.V.V.V.V.V

330.320.F.W.S.L.P.V.V.V.V.V

176.I.L.L.R.L.V.L.V.

188.230.VA.V.A.

243.276.VF.A.A.

291.263.VV.V.A.L.A.V.V.V.V

300.320.S.L.A.V.V.V.V.V.V.V.V

316.311.320.S.L.A.V.V.V.V.V.V.V.V

331.320.F.W.S.L.P.V.V.V.V.V

172.F.F.K.N.M.M.I.R

236.287.I.C.A.I.

231.263.VA.V.

208.274.I.A.L.A.S.A.A.M.A.S.A

302.374.V.V.F.F.E.N.C.I.A.I

392.302.374.V.V.F.F.E.N.C.I.A.I

175.202.F.R.L.M.R.A.

234.232.VV.V.I.

236.268.VV.A.V.

273.285.F.R.V.V.V.V.V.V.V.V

298.310.V.V.V.V.V.V.V.V.V.V

330.320.F.W.S.L.P.V.V.V.V.V

175.A.R.C.V.V.V.V.V.V

184.236.VV.V.I.

236.268.VV.A.V.

273.285.F.R.V.V.V.V.V.V.V.V

298.310.V.V.V.V.V.V.V.V.V.V

330.320.F.W.S.L.P.V.V.V.V.V

176.I.L.L.R.L.V.L.V.

188.230.VA.V.A.

243.276.VF.A.A.

291.263.VV.V.A.L.A.V.V.V.V

300.320.S.L.A.V.V.V.V.V.V.V.V

316.311.320.S.L.A.V.V.V.V.V.V.V.V

331.320.F.W.S.L.P.V.V.V.V.V

172.F.F.K.N.M.M.I.R

236.287.I.C.A.I.

231.263.VA.V.

208.274.I.A.L.A.S.A.A.M.A.S.A

302.374.V.V.F.F.E.N.C.I.A.I

392.302.374.V.V.F.F.E.N.C.I.A.I

175.202.F.R.L.M.R.A.

234.232.VV.V.I.

236.268.VV.A.V.

273.285.F.R.V.V.V.V.V.V.V.V

298.310.V.V.V.V.V.V.V.V.V.V

330.320.F.W.S.L.P.V.V.V.V.V

175.A.R.C.V.V.V.V.V.V

184.236.VV.V.I.

236.268.VV.A.V.

273.285.F.R.V.V.V.V.V.V.V.V

298.310.V.V.V.V.V.V.V.V.V.V

330.320.F.W.S.L.P.V.V.V.V.V

176.I.L.L.R.L.V.L.V.

188.230.VA.V.A.

243.276.VF.A.A.

291.263.VV.V.A.L.A.V.V.V.V

300.320.S.L.A.V.V.V.V.V.V.V.V

316.311.320.S.L.A.V.V.V.V.V.V.V.V

331.320.F.W.S.L.P.V.V.V.V.V

172.F.F.K.N.M.M.I.R

236.287.I.C.A.I.

231.263.VA.V.

208.274.I.A.L.A.S.A.A.M.A.S.A

302.374.V.V.F.F.E.N.C.I.A.I

392.302.374.V.V.F.F.E.N.C.I.A.I

175.202.F.R.L.M.R.A.

234.232.VV.V.I.

236.268.VV.A.V.

273.285.F.R.V.V.V.V.V.V.V.V

298.310.V.V.V.V.V.V.V.V.V.V

330.320.F.W.S.L.P.V.V.V.V.V

175.A.R.C.V.V.V.V.V.V

184.236.VV.V.I.

236.268.VV.A.V.

273.285.F.R.V.V.V.V.V.V.V.V

298.310.V.V.V.V.V.V.V.V.V.V

330.320.F.W.S.L.P.V.V.V.V.V

176.I.L.L.R.L.V.L.V.

188.230.VA.V.A.

243.276.VF.A.A.

291.263.VV.V.A.L.A.V.V.V.V

300.320.S.L.A.V.V.V.V.V.V.V.V

316.311.320.S.L.A.V.V.V.V.V.V.V.V

331.320.F.W.S.L.P.V.V.V.V.V

172.F.F.K.N.M.M.I.R

236.287.I.C.A.I.

231.263.VA.V.

208.274.I.A.L.A.S.A.A.M.A.S.A

302.374.V.V.F.F.E.N.C.I.A.I

392.302.374.V.V.F.F.E.N.C.I.A.I

175.202.F.R.L.M.R.A.

234.232.VV.V.I.

236.268.VV.A.V.

273.285.F.R.V.V.V.V.V.V.V.V

298.310.V.V.V.V.V.V.V.V.V.V

330.320.F.W.S.L.P.V.V.V.V.V

175.A.R.C.V.V.V.V.V.V

184.236.VV.V.I.

236.268.VV.A.V.

273.285.F.R.V.V.V.V.V.V.V.V

298.310.V.V.V.V.V.V.V.V.V.V

330.320.F.W.S.L.P.V.V.V.V.V

176.I.L.L.R.L.V.L.V.

188.230.VA.V.A.

243.276.VF.A.A.

291.263.VV.V.A.L.A.V.V.V.V

300.320.S.L.A.V.V.V.V.V.V.V.V

316.311.320.S.L.A.V.V.V.V.V.V.V.V

331.320.F.W.S.L.P.V.V.V.V.V

172.F.F.K.N.M.M.I.R

236.287.I.C.A.I.

231.263.VA.V.

208.274.I.A.L.A.S.A.A.M.A.S.A

302.374.V.V.F.F.E.N.C.I.A.I

392.302.374.V.V.F.F.E.N.C.I.A.I

175.202.F.R.L.M.R.A.

234.232.VV.V.I.

236.268.VV.A.V.

273.285.F.R.V.V.V.V.V.V.V.V

298.310.V.V.V.V.V.V.V.V.V.V

330.320.F.W.S.L.P.V.V.V.V.V

175.A.R.C.V.V.V.V.V.V

184.236.VV.V.I.

236.268.VV.A.V.

273.285.F.R.V.V.V.V.V.V.V.V

298.310.V.V.V.V.V.V.V.V.V.V

330.320.F.W.S.L.P.V.V.V.V.V

176.I.L.L.R.L.V.L.V.

188.230.VA.V.A.

243.276.VF.A.A.

291.263.VV.V.A.L.A.V.V.V.V

300.320.S.L.A.V.V.V.V.V.V.V.V

316.311.320.S.L.A.V.V.V.V.V.V.V.V

331.320.F.W.S.L.P.V.V.V.V.V

172.F.F.K.N.M.M.I.R

236.287.I.C.A.I.

231.263.VA.V.

208.274.I.A.L.A.S.A.A.M.A.S.A

302.374.V.V.F.F.E.N.C.I.A.I

392.302.374.V.V.F.F.E.N.C.I.A.I

175.202.F.R.L.M.R.A.

234.232.VV.V.I.

236.268.VV.A.V.

273.285.F.R.V.V.V.V.V.V.V.V

298.310.V.V.V.V.V.V.V.V.V.V

330.320.F.W.S.L.P.V.V.V.V.V

175.A.R.C.V.V.V.V.V.V

184.236.VV.V.I.

236.268.VV.A.V.

273.285.F.R.V.V.V.V.V.V.V.V

298.310.V.V.V.V.V.V.V.V.V.V

330.320.F.W.S.L.P.V.V.V.V.V

176.I.L.L.R.L.V.L.V.

188.230.VA.V.A.

243.276.VF.A.A.

291.263.VV.V.A.L.A.V.V.V.V

300.320.S.L.A.V.V.V.V.V.V.V.V

316.311.320.S.L.A.V.V.V.V.V.V.V.V

331.320.F.W.S.L.P.V.V.V.V.V

172.F.F.K.N.M.M.I.R

236.287.I.C.A.I.

231.263.VA.V.

208.274.I.A.L.A.S.A.A.M.A.S.A

302.374.V.V.F.F.E.N.C.I.A.I

392.302.374.V.V.F.F.E.N.C.I.A.I

175.202.F.R.L.M.R.A.

234.232.VV.V.I.

236.268.VV.A.V.

273.285.F.R.V.V.V.V.V.V.V.V

298.310.V.V.V.V.V.V.V.V.V.V

330.320.F.W.S.L.P.V.V.V.V.V

175.A.R.C.V.V.V.V.V.V

184.236.VV.V.I.

236.268.VV.A.V.

273.285.F.R.V.V.V.V.V.V.V.V

298.310.V.V.V.V.V.V.V.V.V.V

330.320.F.W.S.L.P.V.V.V.V.V

176.I.L.L.R.L.V.L.V.

188.230.VA.V.A.

243.276.VF.A.A.

291.263.VV.V.A.L.A.V.V.V.V

300.320.S.L.A.V.V.V.V.V.V.V.V

316.311.320.S.L.A.V.V.V.V.V.V.V.V

331.320.F.W.S.L.P.V.V.V.V.V

172.F.F.K.N.M.M.I.R

236.287.I.C.A.I.

231.263.VA.V.

208.274.I.A.L.A.S.A.A.M.A.S.A

302.374.V.V.F.F.E.N.C.I.A.I

392.302.374.V.V.F.F.E.N.C.I.A.I

175.202.F.R.L.M.R.A.

234.232.VV.V.I.

236.268.VV.A.V.

273.285.F.R.V.V.V.V.V.V.V.V

298.310.V.V.V.V.V.V.V.V.V.V

330.320.F.W.S.L.P.V.V.V.V.V

175.A.R.C.V.V.V.V.V.V

184.236.VV.V.I.

236.268.VV.A.V.

273.285.F.R.V.V.V.V.V.V.V.V

298.310.V.V.V.V.V.V.V.V.V.V

330.320.F.W.S.L.P.V.V.V.V.V

176.I.L.L.R.L.V.L.V.

188.230.VA.V.A.

243.276.VF.A.A.

291.263.VV.V.A.L.A.V.V.V.V

300.320.S.L.A.V.V.V.V.V.V.V.V

316.311.320.S.L.A.V.V.V.V.V.V.V.V

331.320.F.W.S.L.P.V.V.V.V.V

172.F.F.K.N.M.M.I.R

236.287.I.C.A.I.

231.263.VA.V.

208.274.I.A.L.A.S.A.A.M.A.S.A

302.374.V.V.F.F.E.N.C.I.A.I

392.302.374.V.V.F.F.E.N.C.I.A.I

175.202.F.R.L.M.R.A.

234.232.VV.V.I.

236.268.VV.A.V



Supp. Fig. 3

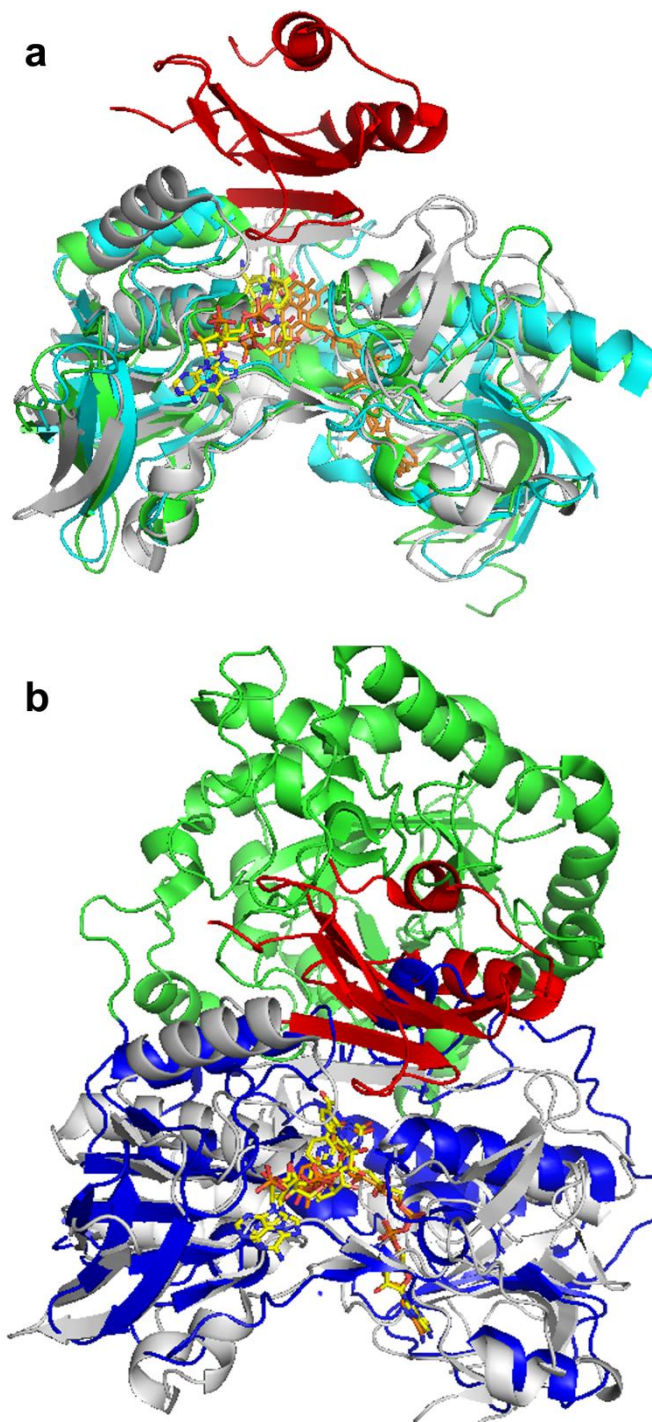

Supp. Fig. 4

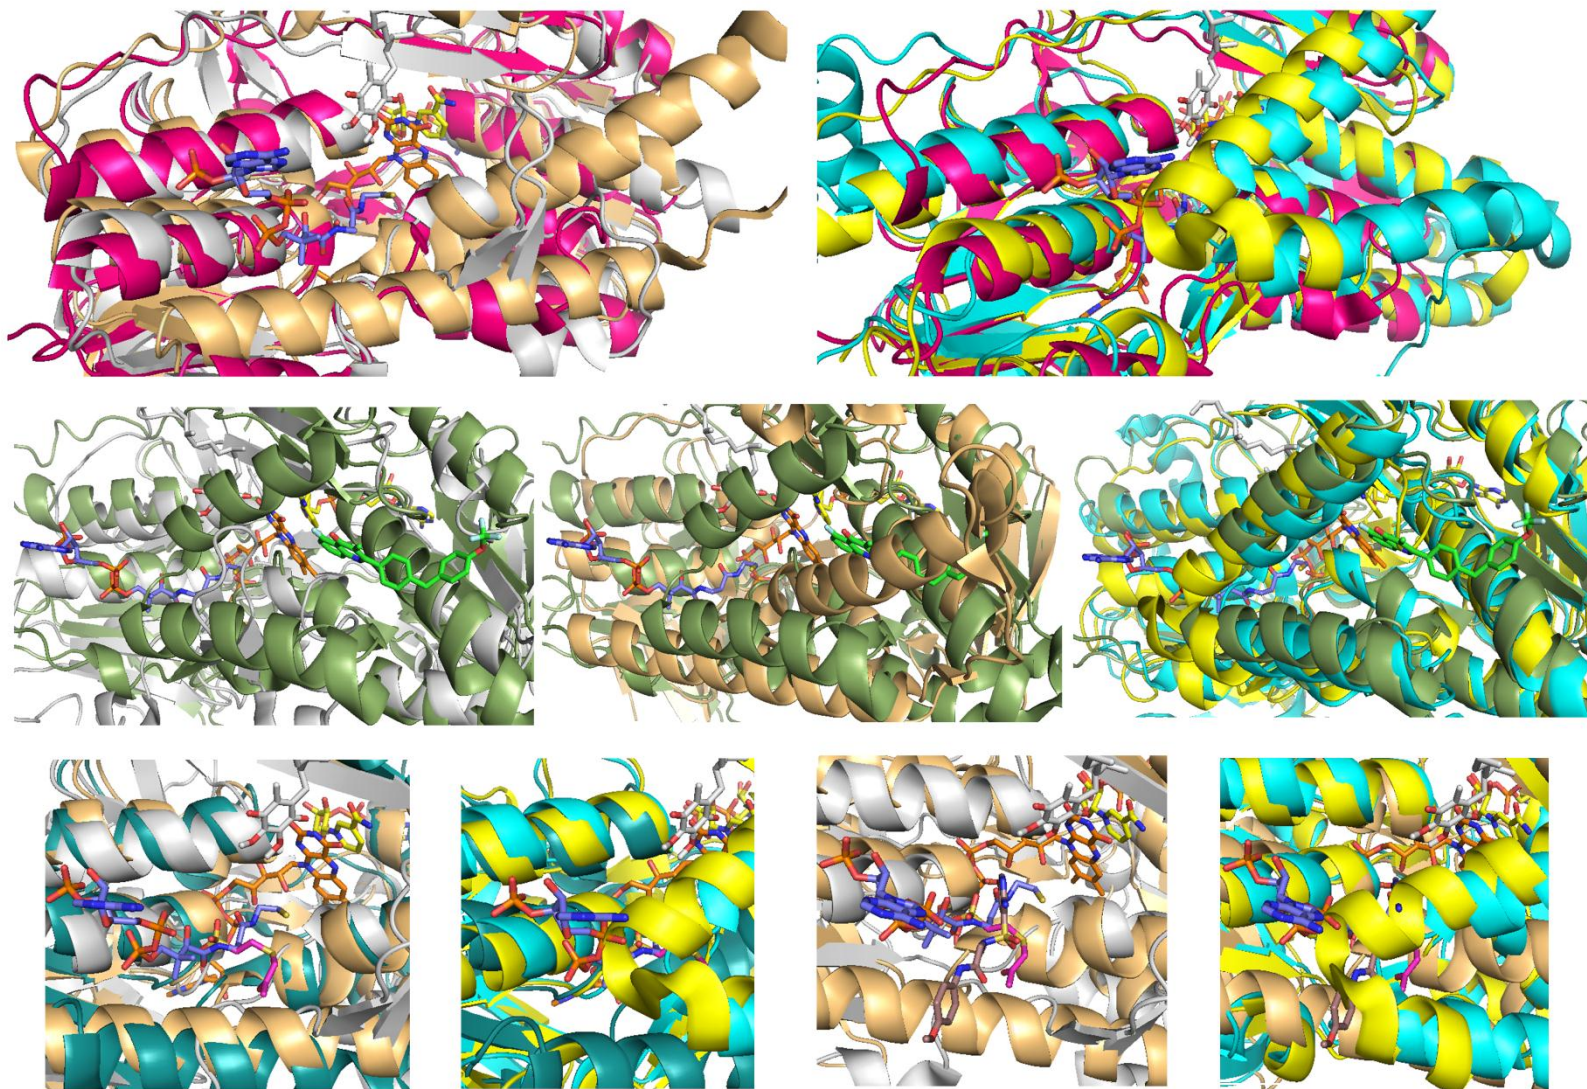



Supp. Fig. 5

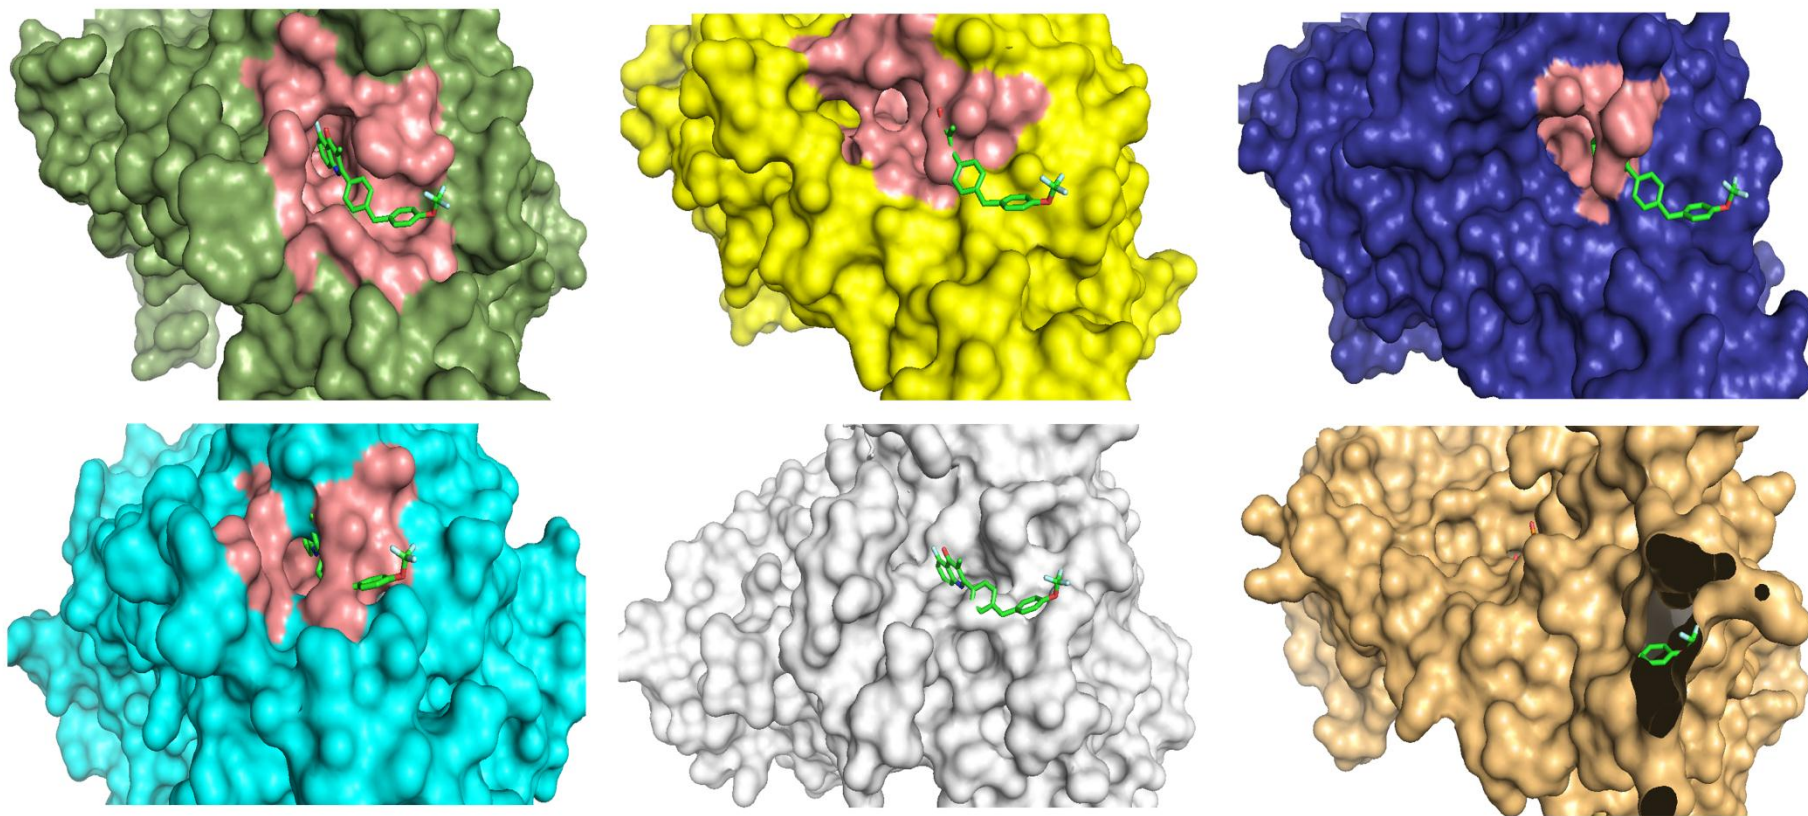

Supp. Fig. 6

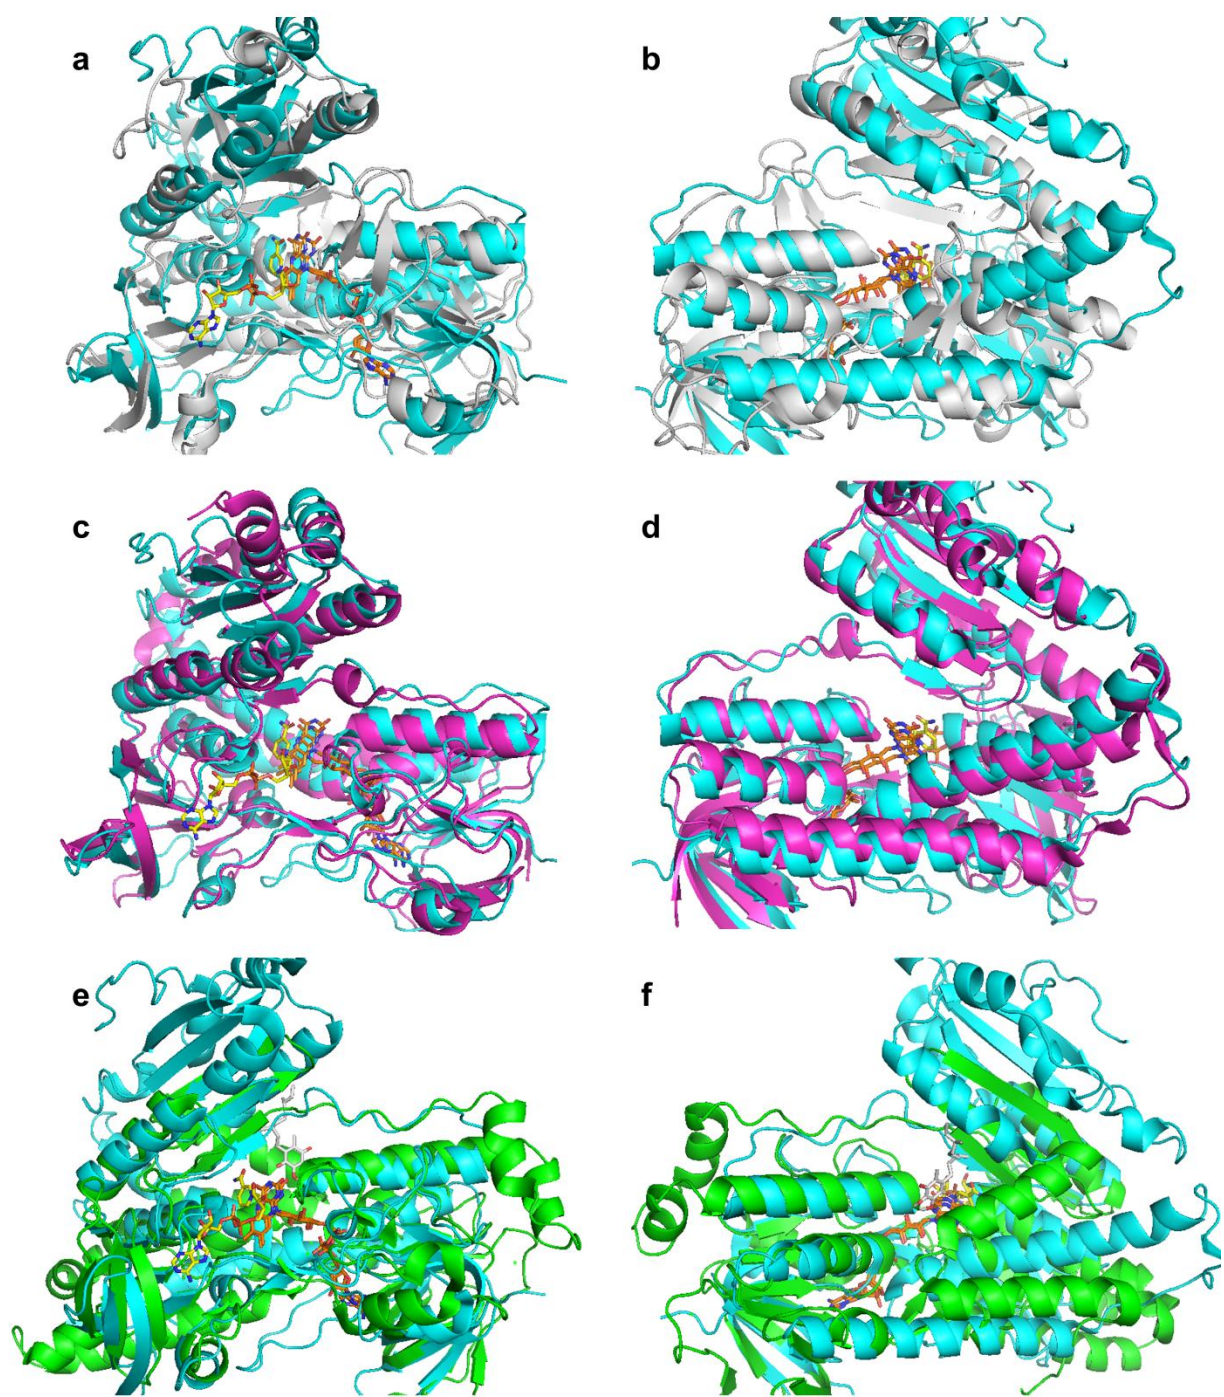





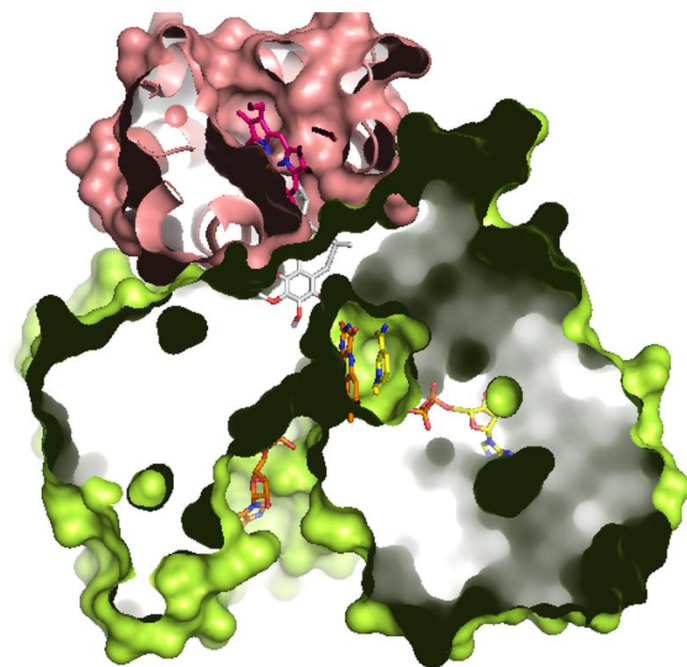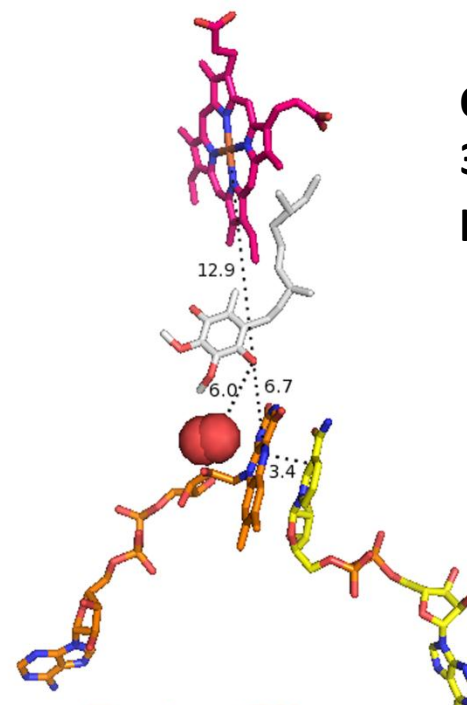

Oxygen from  
3hyw.pdb to be  
put here?

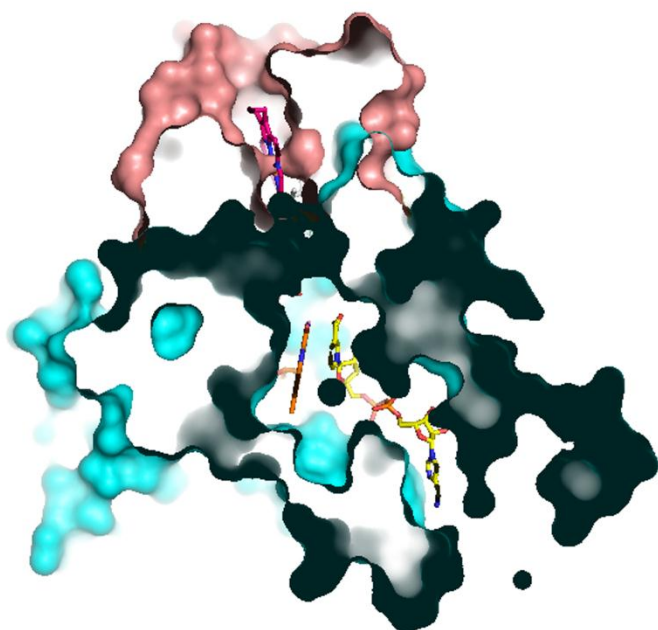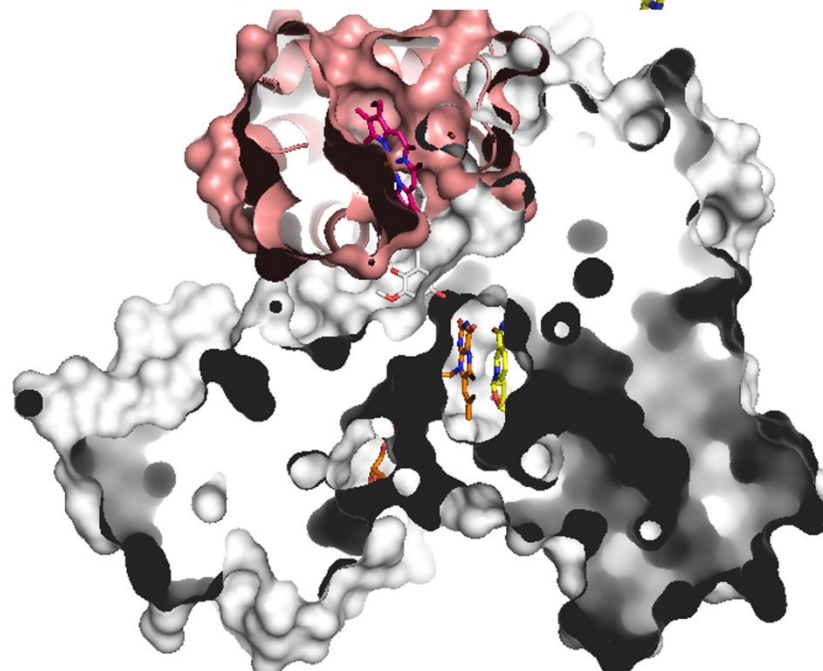

Alternative  
Fig. 6



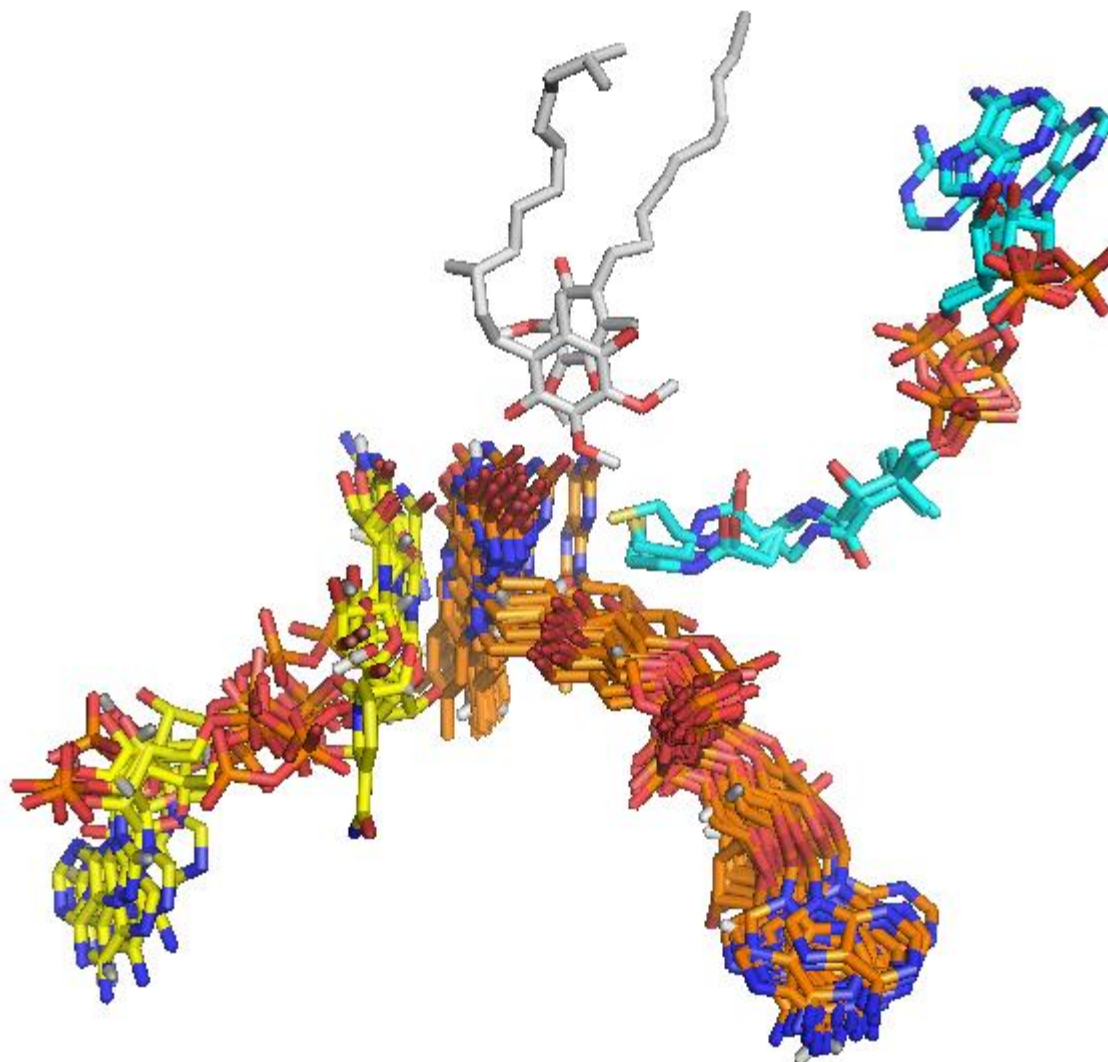

Alternative Panel D for  
Fig. 5; O2 (5vn0.pdb) or  
H2S (3hyw.pdb) here?
